# Supplementary material for: Evaluation of sorbents and matrix effects for treating heavy metals and per- and polyfluoroalkyl substances as co-contaminants in stormwater
Source: Royal Society of Chemistry journal article supplement (doi:10.1039/d3ew00028a), 2023-01-01
Supplement: d3ew00028a1.pdf [file d3ew00028a1.pdf]

1 **Electronic Supplemental Information (ESI)**

2 **Evaluation of Sorbents and Matrix Effects for Treating Stormwater Containing Heavy Metals and**  
3 **Per- and Polyfluoroalkyl Substances**

4 Bethany A. Parker<sup>a</sup>, Casey Kanalos<sup>b</sup>, Tyler S. Radniecki<sup>b</sup>, Staci L. Massey Simonich<sup>a,c</sup>, and Jennifer A.  
5 Field<sup>\*c</sup>

6 <sup>a</sup> Department of Chemistry, Oregon State University, Corvallis, Oregon 97331, USA

7 <sup>b</sup> School of Chemical, Biological and Environmental Engineering, Oregon State University, Corvallis,  
8 Oregon 97331, USA

9 <sup>c</sup> Department of Environmental and Molecular Toxicology, Oregon State University, Corvallis, Oregon  
10 97331, USA

11

12

13

14

15

16

17

18

19

20

21

22

23

24

25

26

27

28

29

30

31

32 **HPLC-TQD-MS Method**

33 Separation and quantification of PFAS were performed using an Agilent 1100 series HPLC (Santa Clara,  
34 CA) that was interfaced with a Triple Quadrupole MS/MS system (Waters Corporation Milford, MA). A  
35 C<sub>18</sub> delay column (4.6x 50mm x 5µm Zorbax Eclipse) was fitted between the HPLC pump and  
36 autosampler to offset any systemic instrument PFAS contamination. Large volume injection (900 µL) was  
37 used for analysis of all samples. Chromatographic separation of all analytes utilized an Eclipse C18  
38 analytical column (4.6x 75mm x 3.5µm). Mobile phases consisted of 20mM ammonium acetate in HPLC  
39 grade water (A) and HPLC grade methanol (B). The gradient conditions consisted of 100% mobile phase  
40 A at 0.5 mL/min for 3.5 min, switching to 100% mobile phase B at a rate of 1 mL/min for 1.5 min, and  
41 then reverting back to mobile phase A at 1.0 mL/min for 4.5 min. After 4.5 min, the flow rate was  
42 reduced to 0.5 mL/min for 0.5 min, yielding a total run time of 10 min. The LOQ for this study was  
43 defined as the lowest calibration standard (20 ng/L) used in the analysis. No samples contained levels of  
44 PFAS above the highest level (10,000 ng/L) of the calibration curve.

45

46

47

48

49

50

51

52

53

54 **Table S1.** PFAS Native and Isotopically Labelled Surrogate Standards

| <b>Chemical Name</b>                                                           | <b>Acronym</b>    | <b>Neutral Molecular Formula<sup>1</sup></b>                   | <b>Surrogate Standard</b> |
|--------------------------------------------------------------------------------|-------------------|----------------------------------------------------------------|---------------------------|
| <b>Perfluoro-n-butanoic acid</b>                                               | PFBA <sup>2</sup> | C <sub>4</sub> H <sub>0</sub> O <sub>2</sub> F <sub>7</sub>    | MPFBA                     |
| <b>Perfluoro-n-pentatonic acid</b>                                             | PFPeA             | C <sub>5</sub> H <sub>0</sub> O <sub>2</sub> F <sub>9</sub>    | M3PFPeA                   |
| <b>Perfluoro-n-hexanoic acid</b>                                               | PFHxA             | C <sub>6</sub> H <sub>0</sub> O <sub>2</sub> F <sub>11</sub>   | M2PFHxA                   |
| <b>Perfluoro-n-heptanoic acid</b>                                              | PFHpA             | C <sub>7</sub> H <sub>0</sub> O <sub>2</sub> F <sub>13</sub>   | M4PFHpA                   |
| <b>Perfluoro-n-octanoic acid</b>                                               | PFOA              | C <sub>8</sub> H <sub>0</sub> O <sub>2</sub> F <sub>15</sub>   | M4PFOA                    |
| <b>Perfluoro-n-nonanoic acid</b>                                               | PFNA              | C <sub>9</sub> H <sub>0</sub> O <sub>2</sub> F <sub>17</sub>   | M5PFNA                    |
| <b>Perfluoro-n-decanoic acid</b>                                               | PFDA              | C <sub>10</sub> H <sub>0</sub> O <sub>2</sub> F <sub>19</sub>  | MPFDA                     |
| <b>Perfluoro-n-undecanoic acid</b>                                             | PFUdA             | C <sub>11</sub> H <sub>0</sub> O <sub>2</sub> F <sub>21</sub>  | MPFUdA                    |
| <b>Perfluorobutane sulfonate</b>                                               | PFBS              | C <sub>4</sub> H <sub>0</sub> O <sub>3</sub> SF <sub>9</sub>   | M3PFBS                    |
| <b>Perfluoropentane sulfonate</b>                                              | PFPeS             | C <sub>5</sub> H <sub>0</sub> O <sub>3</sub> SF <sub>11</sub>  | M3PFBS                    |
| <b>Perfluorohexane sulfonate</b>                                               | PFHxS             | C <sub>6</sub> H <sub>0</sub> O <sub>3</sub> SF <sub>13</sub>  | MPFHxS                    |
| <b>Perfluoroheptane sulfonate</b>                                              | PFHpS             | C <sub>7</sub> H <sub>0</sub> O <sub>3</sub> SF <sub>15</sub>  | MPFOS                     |
| <b>Perfluorooctane sulfonate</b>                                               | PFOS              | C <sub>8</sub> H <sub>0</sub> O <sub>3</sub> SF <sub>17</sub>  | MPFOS                     |
| <b>Perfluorononane sulfonate</b>                                               | PFNS              | C <sub>9</sub> H <sub>0</sub> O <sub>3</sub> SF <sub>19</sub>  | MPFOS                     |
| <b>Perfluorodecane sulfonate</b>                                               | PFDS              | C <sub>10</sub> H <sub>0</sub> O <sub>3</sub> SF <sub>21</sub> | MPFOS                     |
| <b>Perfluorohexane sulfonamide</b>                                             | FHxSA             | C <sub>6</sub> H <sub>2</sub> O <sub>2</sub> NSF <sub>13</sub> | M8FOSA                    |
| <b>Perfluorooctane sulfonamide</b>                                             | FOSA              | C <sub>8</sub> H <sub>2</sub> O <sub>2</sub> NSF <sub>17</sub> | M8FOSA                    |
| <b>dodecafluoro-3H-4,8-dioxanonanoate</b>                                      | ADONA             | C <sub>7</sub> H <sub>2</sub> O <sub>4</sub> F <sub>12</sub>   | MPFDA                     |
| <b>9-chlorohexadecafluoro-3-oxanonane-1-sulfonate</b>                          | 9Cl-PF3ONS        | C <sub>8</sub> HF <sub>16</sub> ClSO <sub>4</sub>              | MPFOS                     |
| <b>11-chloroeicosafluoro-3-oxaundecane-1-sulfonate</b>                         | 11Cl-PF3OUdS      | C <sub>10</sub> HF <sub>20</sub> ClSO <sub>4</sub>             | MPFOS                     |
| <b>2,3,3,3-tetrafluoro-2-(1,1,2,2,3,3,3-heptafluoropropoxy)-propanoic acid</b> | HFPO-DA           | C <sub>6</sub> HF <sub>11</sub> O <sub>3</sub>                 | MHFPO-DA                  |

55

56

57

58

59

60

61

62 **Table S2. Synthetic and OGSIR Stormwater Composition**

|                               | <b>Simple Synthetic</b> | <b>OGSIR SW</b> | <b>Complex Synthetic</b> | <b>Complex Synthetic w/ Iron</b> |
|-------------------------------|-------------------------|-----------------|--------------------------|----------------------------------|
| <b>NH3-N (mg N/L)</b>         | N/A                     | 0.166           | 0.166                    | 0.166                            |
| <b>NO3-N + NO2-N (mg N/L)</b> | N/A                     | 0.051           | 0.051                    | 0.051                            |
| <b>PO4-P (mg P/L)</b>         | N/A                     | 0.028           | 0.028                    | 0.028                            |
| <b>Cl (mg/L)</b>              | 35.4                    | 1.58            | 9.03                     | 9.03                             |
| <b>SO4-S (mg/L)</b>           | N/A                     | 2.26            | 2.25                     | 2.25                             |
| <b>F (mg/L)</b>               | N/A                     | 0.05            | N/A                      | N/A                              |
| <b>Br (mg/L)</b>              | N/A                     | 0.02            | N/A                      | N/A                              |
| <b>Na (mg/L)</b>              | 22.9                    | 4.28            | 6.49                     | 6.49                             |
| <b>K (mg/L)</b>               | N/A                     | 0.91            | 0.909                    | 0.909                            |
| <b>Ca (mg/L)</b>              | N/A                     | 9.7             | 9.7                      | 9.7                              |
| <b>Mg (mg/L)</b>              | N/A                     | 1.68            | 1.71                     | 1.71                             |
| <b>Fe (ug/L)</b>              | N/A                     | 210             | N/A                      | 1500                             |
| <b>HCO3 (mM)</b>              | 0.185                   | N/A             | N/A                      | N/A                              |
| <b>DOC (mg C/L)</b>           | N/A                     | 11              | N/A                      | N/A                              |

63

64

65

66 **Table S3. OGSIR stormwater composition with and without treatment**

|                                  | <b>OGSIR Stormwater</b> | <b>Treated OGSIR Stormwater (Treated with Biochar Basic)</b> |
|----------------------------------|-------------------------|--------------------------------------------------------------|
| <b>pH</b>                        | 7.3                     | 6.7 (little change)                                          |
| <b>Alkalinity (mg CaCO3/L)</b>   | 27                      | 8 (moderate removal)                                         |
| <b>Suspended Sediment (mg/L)</b> | 9.3                     | 2.2 (high removal)                                           |
| <b>Dissolved Solids (mg/L)</b>   | 94                      | 73 (moderate removal)                                        |
| <b>DOC (mg C/L)</b>              | 11                      | 11 (no removal)                                              |
| <b>Fe (ug/L)</b>                 | 210                     | 27 (high removal)                                            |
| <b>TDN (mg N/L)</b>              | 3.8                     | 2.6 (moderate removal)                                       |
| <b>TDP (mg P/L)</b>              | 0.32                    | 0.32 (no removal)                                            |

67

68

69

70

71

72

73 **Table S4. Average percent removal, 95CI, and percent relative standard deviation (%RSD) of**  
 74 **heavy metals and PFAS from screening with synthetic stormwater (n=3 replicates).**

|                          | <b>Copper</b>                | <b>Zinc</b>                  | <b>PFOA</b>                  | <b>PFHxS</b>                 | <b>PFOS</b>                  |
|--------------------------|------------------------------|------------------------------|------------------------------|------------------------------|------------------------------|
|                          | Average ±<br>95CI<br>(% RSD) |
| <b>Biochar<br/>Basic</b> | 93 ± 2<br>(1.8%)             | 75 ± 45<br>(53%)             | 6.5 ± 14.7<br>(200%)         | 4.8 ± 14.7<br>(270%)         | 1.8 ± 19.2<br>(940%)         |
| <b>EarthLite</b>         | 99 ± 0.3<br>(0.3%)           | 96 ± 41<br>(38%)             | 28 ± 17<br>(54%)             | 27 ± 4.4<br>(16%)            | 55 ± 20<br>(33%)             |
| <b>Calgon<br/>F400</b>   | 69 ± 17<br>(25%)             | 2.5 ± 4.5<br>(160%)          | 28 ± 5<br>(15%)              | 81 ± 17<br>(20%)             | 64 ± 3<br>(4.4%)             |
| <b>RemBind</b>           | 82 ± 3<br>(2.9%)             | 60 ± 28<br>(42%)             | 95 ± 3<br>(2.8%)             | 84 ± 7<br>(7.6%)             | 91 ± 4<br>(4.0%)             |

75

76

77

78

79 **Table S5. Percent Removal of PFAS by RemBind™ from OGSIR SW with and without**  
 80 **pretreatment (n = 4).**

|                     | <b>No Pretreatment<br/>(avg ± SD)</b> | <b>With Pretreatment<br/>(avg ± SD)</b> |
|---------------------|---------------------------------------|-----------------------------------------|
| <b>PFBA</b>         | 22.9 ± 22.1                           | 31.2 ± 11.7                             |
| <b>PFPeA</b>        | 25.0 ± 24.5                           | 30.7 ± 9.4                              |
| <b>PFBS</b>         | 19.9 ± 17.1                           | 25.9 ± 11.3                             |
| <b>PFHxA</b>        | 17.5 ± 22.2                           | 27.3 ± 13.2                             |
| <b>PFPeS</b>        | 30.7 ± 11.3                           | 34.0 ± 12.1                             |
| <b>HFPO-DA</b>      | 34.4 ± 14.7                           | 37.9 ± 22.5                             |
| <b>PFHpA</b>        | 30.5 ± 13.5                           | 33.5 ± 6.4                              |
| <b>PFHxS</b>        | 1.6 ± 12.1                            | 17.7 ± 11.6                             |
| <b>ADONA</b>        | -1.3 ± 23.1                           | 32.7 ± 18.9                             |
| <b>PFOA</b>         | 15.1 ± 20.5                           | 41.9 ± 17.1                             |
| <b>PFHpS</b>        | 7.2 ± 21.2                            | 34.6 ± 30.7                             |
| <b>FHxSA</b>        | 36.0 ± 12.2                           | 85.6 ± 3.5                              |
| <b>PFOS</b>         | 20.8 ± 10.5                           | 57.1 ± 6.9                              |
| <b>PFNA</b>         | 18.6 ± 17.1                           | 61.8 ± 8.1                              |
| <b>9Cl-PF3ONS</b>   | 26.7 ± 11.8                           | 29.4 ± 9.3                              |
| <b>PFNS</b>         | 54.6 ± 16.5                           | 85.7 ± 1.5                              |
| <b>PFDA</b>         | 20.4 ± 21.4                           | 76.8 ± 6.6                              |
| <b>FOSA</b>         | 74.4 ± 7.2                            | 95.4 ± 0.4                              |
| <b>PFDS</b>         | 38.8 ± 12.7                           | 79.6 ± 2.5                              |
| <b>PFUdA</b>        | 11.7 ± 19.9                           | 78.1 ± 1.2                              |
| <b>11Cl-PF3OUdS</b> | 66.6 ± 7.6                            | 85.9 ± 2.7                              |

81  
 82  
 83  
 84  
 85  
 86  
 87  
 88  
 89  
 90  
 91  
 92  
 93
